# Supplementary material
Source: Research Square preprint supplement (doi:10.21203/rs.3.rs-9466355/v1)
Supplement: Supplementary file 1 [file 084cf2647e3ab39c7244acc9.pdf]

Table 1. Demographic characteristics (n = 95 patients) and underlying cardiac or pulmonary disease at the time of TAcx collection (n = 196 TAcx).

| <b>Demographic characteristics, n = 95 patients.</b>                                         |            |
|----------------------------------------------------------------------------------------------|------------|
| Male, n (%)                                                                                  | 50 (53)    |
| Female, n (%)                                                                                | 45 (47)    |
| Race, n (%)                                                                                  |            |
| Black or African American                                                                    | 62 (65)    |
| White                                                                                        | 23 (24)    |
| Other/Not Disclosed                                                                          | 10 (11)    |
| Hispanic, n (%)                                                                              | 6 (6)      |
| Median estimated gestational age at birth in weeks (IQR)                                     | 27 (25-35) |
| Birthweight, n (%)                                                                           |            |
| < 1000 grams                                                                                 | 48 (51)    |
| 1000 – 1499 grams                                                                            | 9 (9)      |
| 1500 – 2499 grams                                                                            | 15 (16)    |
| ≥ 2500 grams                                                                                 | 23 (24)    |
| <b>Underlying cardiac or pulmonary disease at the time of TAcx collection, n = 196 TAcx.</b> |            |
| Chronic lung disease of prematurity, n (%)                                                   | 89 (45)    |
| Pulmonary edema, n (%)                                                                       | 44 (22)    |
| Pulmonary hypertension, n (%)                                                                | 94 (48)    |
| Congenital heart disease, n (%)                                                              | 118 (60)   |

|              |          |
|--------------|----------|
| Other, n (%) | 116 (59) |
|--------------|----------|
