# Supplementary material
Source: Research Square preprint supplement (doi:10.21203/rs.3.rs-9466355/v1)
Supplement: Supplementary file 2 [file 7403bea322ceb4ff1cf7c560.pdf]

Table 2. All specimens collected for culture or PCR and how often a potential etiologic organism was isolated from them.

| Specimens Collected | Number Collected | Number of Positives (%) |
|---------------------|------------------|-------------------------|
| TAcx                | 196              | 166 (85)                |
| Blood               | 151              | 14 (9)                  |
| Urine               | 116              | 29 (25)                 |
| CSF                 | 5                | 1 (20)                  |
| Viral PCR Panel     | 87               | 5 (6)                   |
| Other               | 30               | 9 (30)                  |
